# Supplementary material for: A TaON nano-photocatalyst with low surface reduction defects for effective mineralization of chlorophenols under visible light irradiation
Source: Royal Society of Chemistry journal article supplement (doi:10.1039/c3cp51247a), 2013-01-01

## Supporting Information Available

**Fig. S1** Nitrogen adsorption-desorption isotherms and the pore size distribution plot for TaON (U) (inserted).

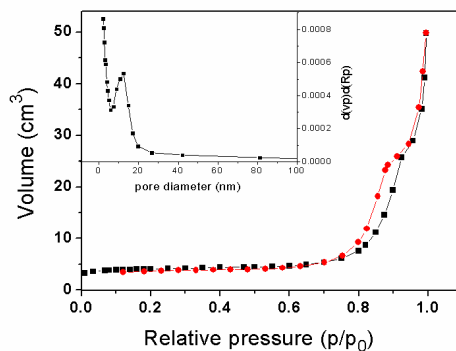

**Fig.S2** Photocatalytic degradation different pollutants over Pt-TaON (U) using xenon lamp under visible light irradiation.

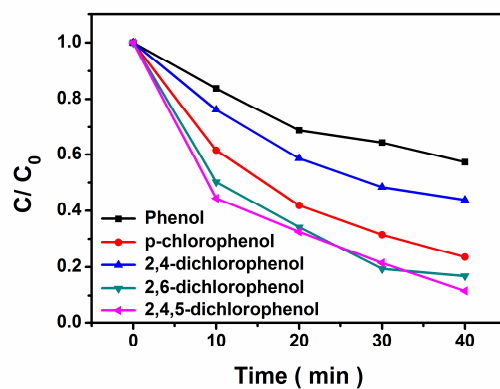

Supplement: c3cp51247a.pdf [file c3cp51247a.pdf]
